# Supplementary material for: Structural-informed functional MRI analysis of patients with empathy impairment following stroke
Source: PubMed Central journal article supplement — J Psychiatry Neurosci. 2024 Oct 25;49(5):E345–56. doi: 10.1503/jpn.240084 (PMC11530265; doi:10.1503/jpn.240084), 2024-10-25
Supplement: JPN-240084-at-1.pdf [file JPN-240084-at-1.pdf]

**Appendix 1** to Qu J-F, Liu X-W, Wang M-Z, et al. Structural-informed functional MRI analysis of patients with empathy impairment following stroke. *J Psychiatry Neurosci* 2024. Copyright © 2024 The Author(s) or their employer(s).

To receive this resource in an accessible format, please contact us at [cmaigroup@cmaj.ca](mailto:cmaigroup@cmaj.ca).

DOI: 10.1503/jpn240084

*Online appendices are unedited and posted as supplied by the authors.*

## The Cambridge Behaviour Scale

*Please fill in this information and then read the instructions below.*

**ALL INFORMATION REMAINS STRICTLY CONFIDENTIAL**

Name:.....Sex:.....

Date of birth:..... Today's date:.....

### **How to fill out the questionnaire**

*Below are a list of statements. Please read each statement very carefully and rate how strongly you agree or disagree with it by circling your answer. There are no right or wrong answers, or trick questions.*

**IN ORDER FOR THE SCALE TO BE VALID, YOU MUST ANSWER EVERY QUESTION.**

### *Examples*

E1. I would be very upset if I couldn't listen to music every day.      strongly agree       slightly agree      slightly disagree      strongly disagree

E2. I prefer to speak to my friends on the phone rather than write letters to them.      strongly agree      slightly agree      slightly disagree       strongly disagree

E3. I have no desire to travel to different parts of the world.       strongly agree      slightly agree      slightly disagree      strongly disagree

E4. I prefer to read than to dance.      strongly agree      slightly agree       slightly disagree      strongly disagree

**Appendix 1** to Qu J-F, Liu X-W, Wang M-Z, et al. Structural-informed functional MRI analysis of patients with empathy impairment following stroke. *J Psychiatry Neurosci* 2024. Copyright © 2024 The Author(s) or their employer(s).

To receive this resource in an accessible format, please contact us at [cmaigroup@cmaij.ca](mailto:cmaigroup@cmaij.ca).

DOI: 10.1503/jpn240084

*Online appendices are unedited and posted as supplied by the authors.*

|                                                                                                                        |                |                |                   |                   |
|------------------------------------------------------------------------------------------------------------------------|----------------|----------------|-------------------|-------------------|
| 1. I can easily tell if someone else wants to enter a conversation.                                                    | strongly agree | slightly agree | slightly disagree | strongly disagree |
| 2. I prefer animals to humans.                                                                                         | strongly agree | slightly agree | slightly disagree | strongly disagree |
| 3. I try to keep up with the current trends and fashions.                                                              | strongly agree | slightly agree | slightly disagree | strongly disagree |
| 4. I find it difficult to explain to others things that I understand easily, when they don't understand it first time. | strongly agree | slightly agree | slightly disagree | strongly disagree |
| 5. I dream most nights.                                                                                                | strongly agree | slightly agree | slightly disagree | strongly disagree |
| 6. I really enjoy caring for other people.                                                                             | strongly agree | slightly agree | slightly disagree | strongly disagree |
| 7. I try to solve my own problems rather than discussing them with others.                                             | strongly agree | slightly agree | slightly disagree | strongly disagree |
| 8. I find it hard to know what to do in a social situation.                                                            | strongly agree | slightly agree | slightly disagree | strongly disagree |
| 9. I am at my best first thing in the morning.                                                                         | strongly agree | slightly agree | slightly disagree | strongly disagree |
| 10. People often tell me that I went too far in driving my point home in a discussion.                                 | strongly agree | slightly agree | slightly disagree | strongly disagree |
| 11. It doesn't bother me too much if I am late meeting a friend.                                                       | strongly agree | slightly agree | slightly disagree | strongly disagree |
| 12. Friendships and relationships are just too difficult, so I tend not to bother with them.                           | strongly agree | slightly agree | slightly disagree | strongly disagree |
| 13. I would never break a law, no matter how minor.                                                                    | strongly agree | slightly agree | slightly disagree | strongly disagree |
| 14. I often find it difficult to judge if something is rude or polite.                                                 | strongly agree | slightly agree | slightly disagree | strongly disagree |
| 15. In a conversation, I tend to focus on my own                                                                       | strongly agree | slightly agree | slightly disagree | strongly disagree |

**Appendix 1** to Qu J-F, Liu X-W, Wang M-Z, et al. Structural-informed functional MRI analysis of patients with empathy impairment following stroke. *J Psychiatry Neurosci* 2024. Copyright © 2024 The Author(s) or their employer(s).

To receive this resource in an accessible format, please contact us at [cmaigroup@cmaij.ca](mailto:cmaigroup@cmaij.ca).

DOI: 10.1503/jpn240084

*Online appendices are unedited and posted as supplied by the authors.*

|                                                                                                       |                |                |                   |                   |
|-------------------------------------------------------------------------------------------------------|----------------|----------------|-------------------|-------------------|
| thoughts rather than on what my listener might be thinking.                                           | agree          | agree          | disagree          | disagree          |
| 16. I prefer practical jokes to verbal humour.                                                        | strongly agree | slightly agree | slightly disagree | strongly disagree |
| 17. I live life for today rather than the future.                                                     | strongly agree | slightly agree | slightly disagree | strongly disagree |
| 18. When I was a child, I enjoyed cutting up worms to see what would happen.                          | strongly agree | slightly agree | slightly disagree | strongly disagree |
| 19. I can pick up quickly if someone says one thing but means another.                                | strongly agree | slightly agree | slightly disagree | strongly disagree |
| 20. I tend to have very strong opinions about morality.                                               | strongly agree | slightly agree | slightly disagree | strongly disagree |
| 21. It is hard for me to see why some things upset people so much.                                    | strongly agree | slightly agree | slightly disagree | strongly disagree |
| 22. I find it easy to put myself in somebody else's shoes.                                            | strongly agree | slightly agree | slightly disagree | strongly disagree |
| 23. I think that good manners are the most important thing a parent can teach their child.            | strongly agree | slightly agree | slightly disagree | strongly disagree |
| 24. I like to do things on the spur of the moment.                                                    | strongly agree | slightly agree | slightly disagree | strongly disagree |
| 25. I am good at predicting how someone will feel.                                                    | strongly agree | slightly agree | slightly disagree | strongly disagree |
| 26. I am quick to spot when someone in a group is feeling awkward or uncomfortable.                   | strongly agree | slightly agree | slightly disagree | strongly disagree |
| 27. If I say something that someone else is offended by, I think that that's their problem, not mine. | strongly agree | slightly agree | slightly disagree | strongly disagree |
| 28. If anyone asked me if I liked their haircut, I would reply truthfully, even if I didn't like it.  | strongly agree | slightly agree | slightly disagree | strongly disagree |
| 29. I can't always see why someone should have felt offended by a remark.                             | strongly agree | slightly agree | slightly disagree | strongly disagree |

**Appendix 1** to Qu J-F, Liu X-W, Wang M-Z, et al. Structural-informed functional MRI analysis of patients with empathy impairment following stroke. *J Psychiatry Neurosci* 2024. Copyright © 2024 The Author(s) or their employer(s).

To receive this resource in an accessible format, please contact us at [cmaigroup@cmaj.ca](mailto:cmaigroup@cmaj.ca).

DOI: 10.1503/jpn240084

*Online appendices are unedited and posted as supplied by the authors.*

|                                                                                                      |                |                |                   |                   |
|------------------------------------------------------------------------------------------------------|----------------|----------------|-------------------|-------------------|
| 30. People often tell me that I am very unpredictable.                                               | strongly agree | slightly agree | slightly disagree | strongly disagree |
| 31. I enjoy being the centre of attention at any social gathering.                                   | strongly agree | slightly agree | slightly disagree | strongly disagree |
| 32. Seeing people cry doesn't really upset me.                                                       | strongly agree | slightly agree | slightly disagree | strongly disagree |
| 33. I enjoy having discussions about politics.                                                       | strongly agree | slightly agree | slightly disagree | strongly disagree |
| 34. I am very blunt, which some people take to be rudeness, even though this is unintentional.       | strongly agree | slightly agree | slightly disagree | strongly disagree |
| 35. I don't tend to find social situations confusing.                                                | strongly agree | slightly agree | slightly disagree | strongly disagree |
| 36. Other people tell me I am good at understanding how they are feeling and what they are thinking. | strongly agree | slightly agree | slightly disagree | strongly disagree |
| 37. When I talk to people, I tend to talk about their experiences rather than my own.                | strongly agree | slightly agree | slightly disagree | strongly disagree |
| 38. It upsets me to see an animal in pain.                                                           | strongly agree | slightly agree | slightly disagree | strongly disagree |
| 39. I am able to make decisions without being influenced by people's feelings.                       | strongly agree | slightly agree | slightly disagree | strongly disagree |
| 40. I can't relax until I have done everything I had planned to do that day.                         | strongly agree | slightly agree | slightly disagree | strongly disagree |
| 41. I can easily tell if someone else is interested or bored with what I am saying.                  | strongly agree | slightly agree | slightly disagree | strongly disagree |
| 42. I get upset if I see people suffering on news programmes.                                        | strongly agree | slightly agree | slightly disagree | strongly disagree |
| 43. Friends usually talk to me about their problems as they say that I am very understanding.        | strongly agree | slightly agree | slightly disagree | strongly disagree |

**Appendix 1** to Qu J-F, Liu X-W, Wang M-Z, et al. Structural-informed functional MRI analysis of patients with empathy impairment following stroke. *J Psychiatry Neurosci* 2024. Copyright © 2024 The Author(s) or their employer(s).

To receive this resource in an accessible format, please contact us at [cmaigroup@cmaj.ca](mailto:cmaigroup@cmaj.ca).

DOI: 10.1503/jpn240084

*Online appendices are unedited and posted as supplied by the authors.*

|                                                                                                     |                |                |                   |                   |
|-----------------------------------------------------------------------------------------------------|----------------|----------------|-------------------|-------------------|
| 44. I can sense if I am intruding, even if the other person doesn't tell me.                        | strongly agree | slightly agree | slightly disagree | strongly disagree |
| 45. I often start new hobbies but quickly become bored with them and move on to something else.     | strongly agree | slightly agree | slightly disagree | strongly disagree |
| 46. People sometimes tell me that I have gone too far with teasing.                                 | strongly agree | slightly agree | slightly disagree | strongly disagree |
| 47. I would be too nervous to go on a big rollercoaster.                                            | strongly agree | slightly agree | slightly disagree | strongly disagree |
| 48. Other people often say that I am insensitive, though I don't always see why.                    | strongly agree | slightly agree | slightly disagree | strongly disagree |
| 49. If I see a stranger in a group, I think that it is up to them to make an effort to join in.     | strongly agree | slightly agree | slightly disagree | strongly disagree |
| 50. I usually stay emotionally detached when watching a film.                                       | strongly agree | slightly agree | slightly disagree | strongly disagree |
| 51. I like to be very organised in day to day life and often make lists of the chores I have to do. | strongly agree | slightly agree | slightly disagree | strongly disagree |
| 52. I can tune into how someone else feels rapidly and intuitively.                                 | strongly agree | slightly agree | slightly disagree | strongly disagree |
| 53. I don't like to take risks.                                                                     | strongly agree | slightly agree | slightly disagree | strongly disagree |
| 54. I can easily work out what another person might want to talk about.                             | strongly agree | slightly agree | slightly disagree | strongly disagree |
| 55. I can tell if someone is masking their true emotion.                                            | strongly agree | slightly agree | slightly disagree | strongly disagree |
| 56. Before making a decision I always weigh up the pros and cons.                                   | strongly agree | slightly agree | slightly disagree | strongly disagree |
| 57. I don't consciously work out the rules of social situations.                                    | strongly agree | slightly agree | slightly disagree | strongly disagree |
| 58. I am good at predicting what someone will do.                                                   | strongly agree | slightly agree | slightly disagree | strongly disagree |

**Appendix 1** to Qu J-F, Liu X-W, Wang M-Z, et al. Structural-informed functional MRI analysis of patients with empathy impairment following stroke. *J Psychiatry Neurosci* 2024. Copyright © 2024 The Author(s) or their employer(s).

To receive this resource in an accessible format, please contact us at [cmaigroup@cmaj.ca](mailto:cmaigroup@cmaj.ca).

DOI: 10.1503/jpn240084

*Online appendices are unedited and posted as supplied by the authors.*

|                                                                                           |                |                |                   |                   |
|-------------------------------------------------------------------------------------------|----------------|----------------|-------------------|-------------------|
|                                                                                           | agree          | agree          | disagree          | disagree          |
| 59. I tend to get emotionally involved with a friend's problems.                          | strongly agree | slightly agree | slightly disagree | strongly disagree |
| 60. I can usually appreciate the other person's viewpoint, even if I don't agree with it. | strongly agree | slightly agree | slightly disagree | strongly disagree |

*Thank you for filling this questionnaire in.*

© MRC-SBC/SJW Feb 1999
