# Supplementary material for: Structural-informed functional MRI analysis of patients with empathy impairment following stroke
Source: PubMed Central journal article supplement — J Psychiatry Neurosci. 2024 Oct 25;49(5):E345–56. doi: 10.1503/jpn.240084 (PMC11530265; doi:10.1503/jpn.240084), 2024-10-25
Supplement: JPN-240084-at-2.pdf [file JPN-240084-at-2.pdf]

Online appendices are unedited and posted as supplied by the authors.

Supplemental table 1. Acquisition parameters of multimodal MRI

| Sequence | Basic | TR/TE     | FOV     | Slice thickness | Gap | Matrix  | b-value | Others                               |
|----------|-------|-----------|---------|-----------------|-----|---------|---------|--------------------------------------|
| 3D-T1WI  | TSE   | 2300/2.27 | 250×250 | 1               | 0.5 | 256×256 | -       | -                                    |
| T2WI     | TSE   | 6610/96   | 230×208 | 3               | 0.9 | 448×313 | -       | -                                    |
| DWI      | EPI   | 5000/78   | 230×230 | 5               | 1.5 | 256×256 | 1000    | -                                    |
| DTI      | EPI   | 9100/100  | 245×245 | 2               | 0.6 | 224×224 | 1000    | Thirty diffusion gradient directions |
| rs-fMRI  | EPI   | 2800/30   | 220×220 | 3.2             | 0.8 | 64 × 64 | -       | In-plane resolution= 3.4×3.4×3.2mm   |

Note: MRI:magnetic resonance imaging; DWI: diffusion weight imaging; DTI: diffusion tensor imaging; rs-fMRI: resting-state functional magnetic resonance imaging; TSE: fast spin echo; EPI: echo planar Imaging; TR: repetition time, millisecond (ms); TE: echo time, ms; FOV: field of view, millimeter<sup>2</sup> (mm<sup>2</sup>);Slice thickness: mm, Gap: mm.

Supplemental table 2. The univariate analysis of structural connectivity<sup>a</sup> between stroke patients and healthy control.

| Brain structure | MD     |      |                 |      |              | FA     |      |                 |      |              |
|-----------------|--------|------|-----------------|------|--------------|--------|------|-----------------|------|--------------|
|                 | Stroke |      | Healthy control |      | P            | Stroke |      | Healthy control |      | P            |
|                 | Mean   | SD   | Mean            | SD   |              | Mean   | SD   | Mean            | SD   |              |
| MCP             | 0.74   | 0.05 | 0.71            | 0.04 | <b>0.018</b> | 0.57   | 0.03 | 0.58            | 0.02 | 0.054        |
| PCT             | 0.78   | 0.12 | 0.76            | 0.10 | 0.430        | 0.50   | 0.07 | 0.52            | 0.05 | 0.118        |
| GCC             | 0.84   | 0.09 | 0.76            | 0.04 | <b>0.000</b> | 0.59   | 0.05 | 0.64            | 0.02 | <b>0.000</b> |
| BCC             | 0.98   | 0.26 | 0.84            | 0.08 | <b>0.016</b> | 0.58   | 0.09 | 0.65            | 0.05 | <b>0.001</b> |
| SCC             | 0.97   | 0.27 | 0.84            | 0.06 | <b>0.034</b> | 0.64   | 0.10 | 0.69            | 0.03 | <b>0.039</b> |
| FX              | 1.65   | 0.34 | 1.50            | 0.33 | 0.077        | 0.46   | 0.10 | 0.51            | 0.09 | <b>0.018</b> |
| CST-R           | 0.76   | 0.07 | 0.74            | 0.08 | 0.282        | 0.57   | 0.06 | 0.59            | 0.05 | 0.120        |
| CST-L           | 0.77   | 0.09 | 0.74            | 0.07 | 0.166        | 0.57   | 0.07 | 0.60            | 0.04 | 0.113        |
| ML-R            | 0.77   | 0.08 | 0.74            | 0.04 | 0.136        | 0.61   | 0.07 | 0.63            | 0.03 | 0.261        |
| ML-L            | 0.77   | 0.09 | 0.74            | 0.04 | 0.151        | 0.61   | 0.07 | 0.62            | 0.03 | 0.561        |
| ICP-R           | 0.76   | 0.07 | 0.73            | 0.02 | <b>0.027</b> | 0.57   | 0.05 | 0.59            | 0.02 | 0.068        |
| ICP-L           | 0.78   | 0.11 | 0.73            | 0.02 | <b>0.035</b> | 0.57   | 0.06 | 0.59            | 0.02 | 0.074        |
| SCP-R           | 0.96   | 0.10 | 0.93            | 0.08 | 0.175        | 0.68   | 0.06 | 0.68            | 0.03 | 0.698        |
| SCP-L           | 0.96   | 0.09 | 0.92            | 0.08 | 0.054        | 0.68   | 0.07 | 0.69            | 0.02 | 0.300        |
| CP-R            | 0.81   | 0.14 | 0.73            | 0.06 | <b>0.012</b> | 0.65   | 0.05 | 0.67            | 0.03 | 0.054        |

DOI: 10.1503/jpn240084

*Online appendices are unedited and posted as supplied by the authors.*

|         |      |      |      |      |              |      |      |      |      |              |
|---------|------|------|------|------|--------------|------|------|------|------|--------------|
| CP-L    | 0.81 | 0.19 | 0.73 | 0.06 | <b>0.047</b> | 0.65 | 0.07 | 0.68 | 0.02 | <b>0.045</b> |
| ALIC-R  | 0.77 | 0.07 | 0.71 | 0.07 | <b>0.001</b> | 0.54 | 0.05 | 0.58 | 0.03 | <b>0.000</b> |
| ALIC-L  | 0.78 | 0.10 | 0.71 | 0.07 | <b>0.002</b> | 0.51 | 0.06 | 0.55 | 0.04 | <b>0.001</b> |
| PLIC-R  | 0.72 | 0.04 | 0.68 | 0.03 | <b>0.000</b> | 0.65 | 0.04 | 0.67 | 0.02 | <b>0.026</b> |
| PLIC-L  | 0.72 | 0.05 | 0.70 | 0.04 | 0.063        | 0.65 | 0.04 | 0.67 | 0.02 | 0.077        |
| RLIC-R  | 0.83 | 0.18 | 0.74 | 0.03 | <b>0.034</b> | 0.59 | 0.06 | 0.62 | 0.03 | 0.055        |
| RLIC-L  | 0.80 | 0.11 | 0.75 | 0.03 | <b>0.031</b> | 0.61 | 0.06 | 0.64 | 0.02 | <b>0.044</b> |
| ACR-R   | 0.82 | 0.10 | 0.75 | 0.09 | <b>0.009</b> | 0.42 | 0.05 | 0.47 | 0.04 | <b>0.000</b> |
| ACR-L   | 0.82 | 0.11 | 0.75 | 0.10 | <b>0.009</b> | 0.41 | 0.05 | 0.45 | 0.04 | <b>0.000</b> |
| SCR-R   | 0.80 | 0.15 | 0.70 | 0.08 | <b>0.007</b> | 0.48 | 0.05 | 0.52 | 0.04 | <b>0.002</b> |
| SCR-L   | 0.81 | 0.16 | 0.73 | 0.12 | <b>0.042</b> | 0.48 | 0.05 | 0.51 | 0.05 | <b>0.018</b> |
| PCR-R   | 0.90 | 0.19 | 0.81 | 0.12 | <b>0.047</b> | 0.46 | 0.05 | 0.49 | 0.04 | 0.052        |
| PCR-L   | 0.91 | 0.24 | 0.80 | 0.13 | 0.070        | 0.45 | 0.06 | 0.48 | 0.05 | <b>0.036</b> |
| PTR-R   | 0.88 | 0.16 | 0.82 | 0.05 | 0.078        | 0.57 | 0.07 | 0.60 | 0.04 | 0.053        |
| PTR-L   | 0.90 | 0.16 | 0.83 | 0.05 | 0.063        | 0.58 | 0.06 | 0.60 | 0.04 | <b>0.039</b> |
| SS-R    | 0.89 | 0.25 | 0.81 | 0.04 | 0.164        | 0.54 | 0.07 | 0.58 | 0.03 | 0.055        |
| SS-L    | 0.88 | 0.13 | 0.84 | 0.05 | 0.156        | 0.55 | 0.05 | 0.57 | 0.03 | 0.092        |
| EC-R    | 0.80 | 0.08 | 0.75 | 0.05 | <b>0.007</b> | 0.45 | 0.04 | 0.47 | 0.03 | <b>0.009</b> |
| EC-L    | 0.81 | 0.09 | 0.76 | 0.07 | <b>0.015</b> | 0.45 | 0.05 | 0.48 | 0.04 | <b>0.011</b> |
| CGC-R   | 0.77 | 0.18 | 0.72 | 0.04 | 0.216        | 0.49 | 0.05 | 0.53 | 0.03 | <b>0.002</b> |
| CGC-L   | 0.79 | 0.22 | 0.73 | 0.03 | 0.219        | 0.50 | 0.06 | 0.54 | 0.03 | <b>0.005</b> |
| CGH-R   | 0.81 | 0.13 | 0.76 | 0.04 | 0.072        | 0.48 | 0.05 | 0.51 | 0.04 | <b>0.018</b> |
| CGH-L   | 0.84 | 0.18 | 0.77 | 0.03 | 0.081        | 0.48 | 0.04 | 0.51 | 0.04 | <b>0.005</b> |
| FX/ST-R | 1.06 | 0.20 | 0.93 | 0.08 | <b>0.005</b> | 0.51 | 0.06 | 0.56 | 0.04 | <b>0.001</b> |
| FX/ST-L | 0.87 | 0.10 | 0.81 | 0.05 | <b>0.013</b> | 0.55 | 0.05 | 0.58 | 0.04 | <b>0.006</b> |
| SLF-R   | 0.76 | 0.07 | 0.70 | 0.04 | <b>0.000</b> | 0.49 | 0.05 | 0.53 | 0.03 | <b>0.008</b> |
| SLF-L   | 0.76 | 0.10 | 0.70 | 0.04 | <b>0.011</b> | 0.48 | 0.06 | 0.52 | 0.03 | <b>0.008</b> |
| SFO-R   | 0.84 | 0.18 | 0.73 | 0.10 | <b>0.006</b> | 0.45 | 0.08 | 0.52 | 0.04 | <b>0.000</b> |
| SFO-L   | 0.89 | 0.17 | 0.77 | 0.14 | <b>0.004</b> | 0.42 | 0.07 | 0.48 | 0.05 | <b>0.000</b> |
| IFO-R   | 0.80 | 0.05 | 0.77 | 0.04 | <b>0.019</b> | 0.54 | 0.04 | 0.57 | 0.03 | <b>0.001</b> |
| IFO-L   | 0.80 | 0.06 | 0.77 | 0.04 | <b>0.006</b> | 0.51 | 0.05 | 0.54 | 0.03 | <b>0.007</b> |

DOI: 10.1503/jpn240084

Online appendices are unedited and posted as supplied by the authors.

|       |      |      |      |      |              |      |      |      |      |              |
|-------|------|------|------|------|--------------|------|------|------|------|--------------|
| UNC-R | 0.77 | 0.04 | 0.76 | 0.04 | 0.258        | 0.53 | 0.05 | 0.54 | 0.04 | 0.334        |
| UNC-L | 0.78 | 0.11 | 0.75 | 0.04 | 0.261        | 0.52 | 0.06 | 0.54 | 0.04 | 0.260        |
| TAP-R | 1.74 | 0.32 | 1.45 | 0.23 | <b>0.000</b> | 0.41 | 0.09 | 0.50 | 0.07 | <b>0.000</b> |
| TAP-L | 1.93 | 0.33 | 1.66 | 0.26 | <b>0.001</b> | 0.37 | 0.08 | 0.45 | 0.08 | <b>0.000</b> |

Note: <sup>a</sup> Mean (SD), ANOVA. MD: mean diffusivity, L: left, R: right, MCP: middle cerebellar peduncle, PCT: pontine crossing tract (part of the MCP); GCC: genu of the corpus callosum, BCC: body of the corpus callosum, SCC: splenium of the corpus callosum, FX: fornix, CST: corticospinal tract, ML: medial lemniscus, ICP: inferior cerebellar peduncle, SCP: superior cerebellar peduncle, CP: cerebral peduncle, ALIC: anterior limb of the internal capsule, PLIC: posterior limb of the internal capsule, RLIC: retrolenticular part of internal capsule, ACR: anterior corona radiata, SCR: superior corona radiata, PCR: posterior corona radiata, PTR: posterior thalamic radiation (including optic radiation), SS: sagittal stratum (including inferior longitudinal fasciculus and inferior fronto-occipital fasciculus), EC: external capsule, CGC: cingulum (cingulate gyrus), CGH: cingulum (hippocampus), FX/ST: fornix (cres) / stria terminalis (can not be resolved with current resolution), SLF: superior longitudinal fasciculus, SFO: superior fronto-occipital fasciculus (could be a part of the anterior internal capsule), IFO: inferior fronto-occipital fasciculus, UNC: uncinata fasciculus, TAP: tapetum.

Supplemental table 3. The collinearity between the putative risk factors following the correlation analysis.

| Variable 1          | Varibale 2  | r      | P    |
|---------------------|-------------|--------|------|
| L-occipital atrophy | R-cingulate | 0.446  | .000 |
| L-temporal atrophy  | FX-FA       | -0.425 | .000 |
| BCC-FA              | R-TAP--FA   | 0.612  | .000 |
| FX-FA               | FX-MD       | -0.929 | .000 |
| L-SFO-FA            | R-TAP--FA   | 0.504  | .000 |
| L-UNC-FA            | BBC-FA      | 0.408  | .000 |
| R-TAP-MD            | L-TAP-MD    | 0.8    | .000 |
| R-TAP-MD            | BBC-FA      | -0.445 | .000 |

Note: L: left, R:

right, FA: fractional anisotropy, MD: mean diffusivity, BCC: body of the corpus callosum,

DOI: 10.1503/jpn240084

Online appendices are unedited and posted as supplied by the authors.

FX: fornix, SFO: superior fronto-occipital fasciculus, UNC: uncinate fasciculus, TAP: tapetum.

**Figure 1 Flow-chart**

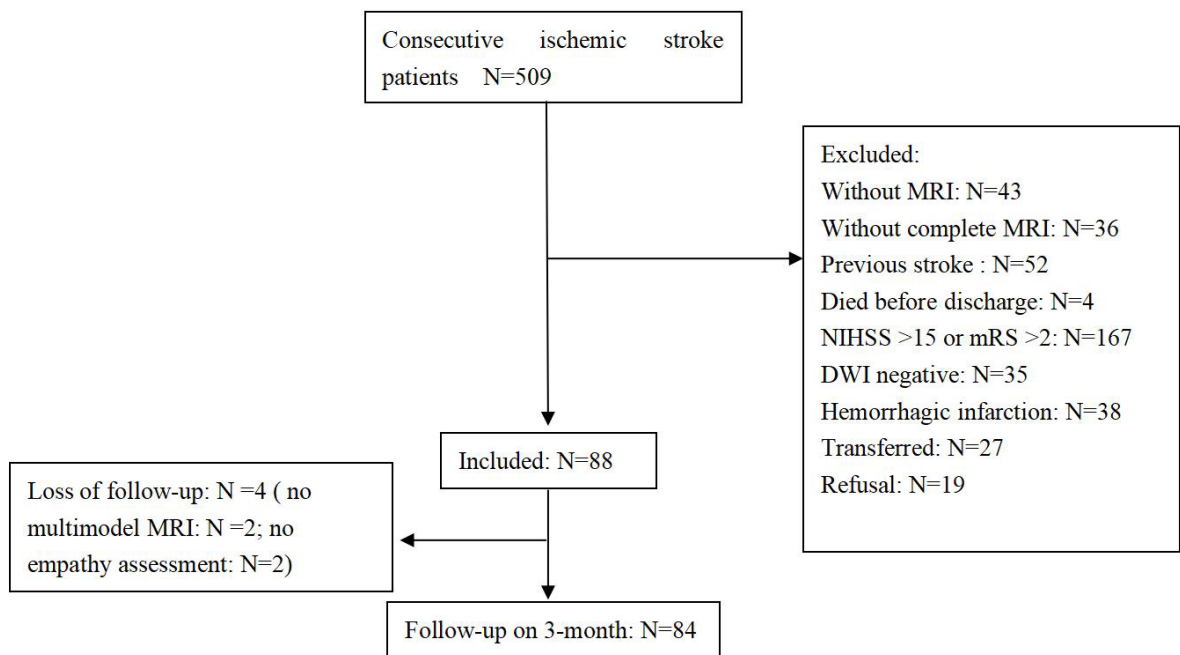

Supplemental figure 1. Flowchart of the study.

**Appendix 2** to Qu J-F, Liu X-W, Wang M-Z, et al. Structural-informed functional MRI analysis of patients with empathy impairment following stroke. *J Psychiatry Neurosci* 2024. Copyright © 2024 The Author(s) or their employer(s).

To receive this resource in an accessible format, please contact us at [cmaigroup@cmaj.ca](mailto:cmaigroup@cmaj.ca).

DOI: 10.1503/jpn240084

*Online appendices are unedited and posted as supplied by the authors.*

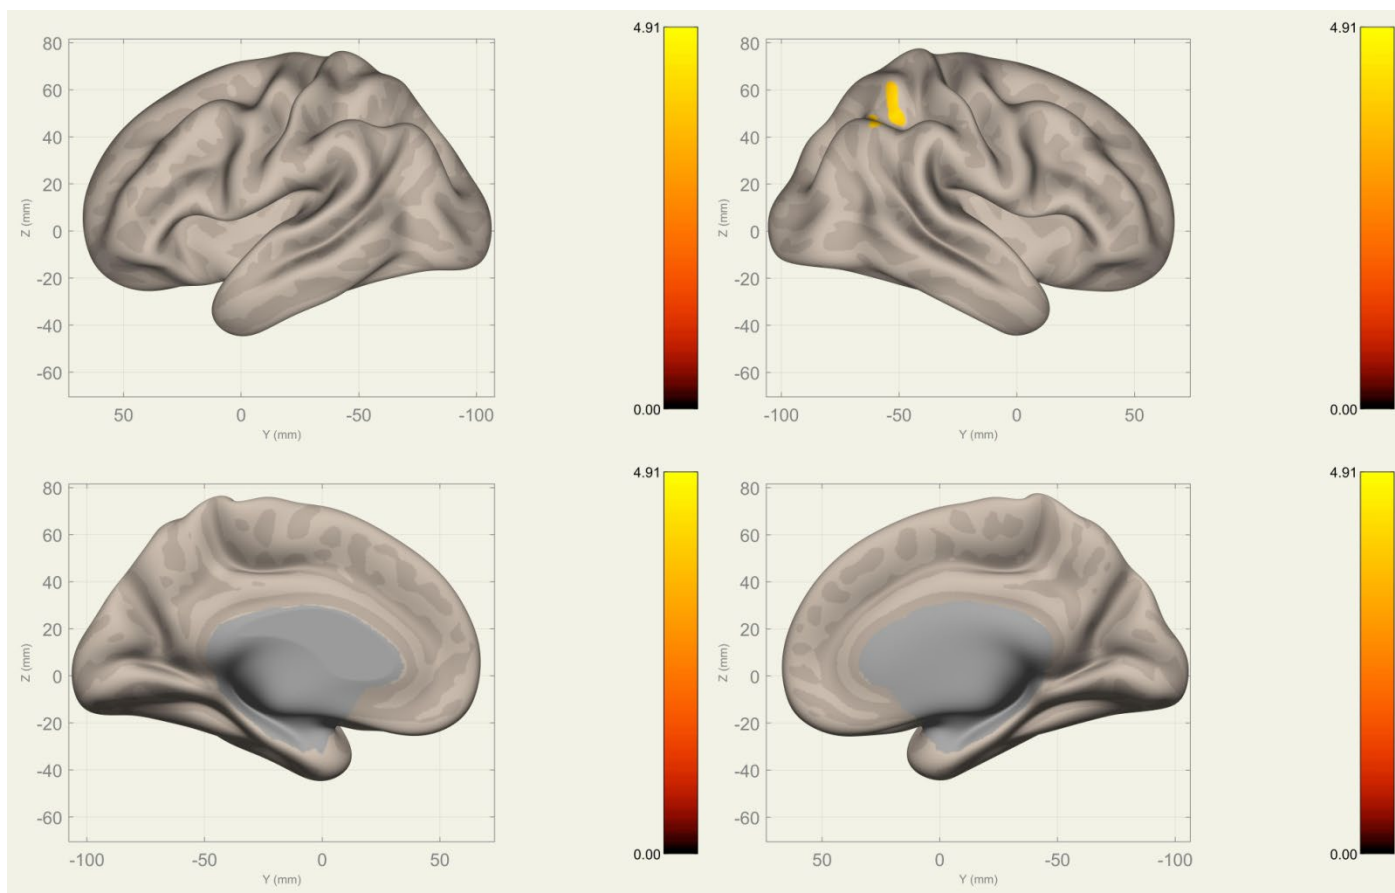

Supplemental figure 2. Seed-to-voxel analysis between low empathy vs. high empathy. Cluster +36 -50 +44, 136 voxels (69%) covering 9% of atlas right superior parietal lobule, indicated that the functional connectivity between anterior division of cingulate gyrus and right superior parietal lobule was relatively increased.

DOI: 10.1503/jpn240084

Online appendices are unedited and posted as supplied by the authors.

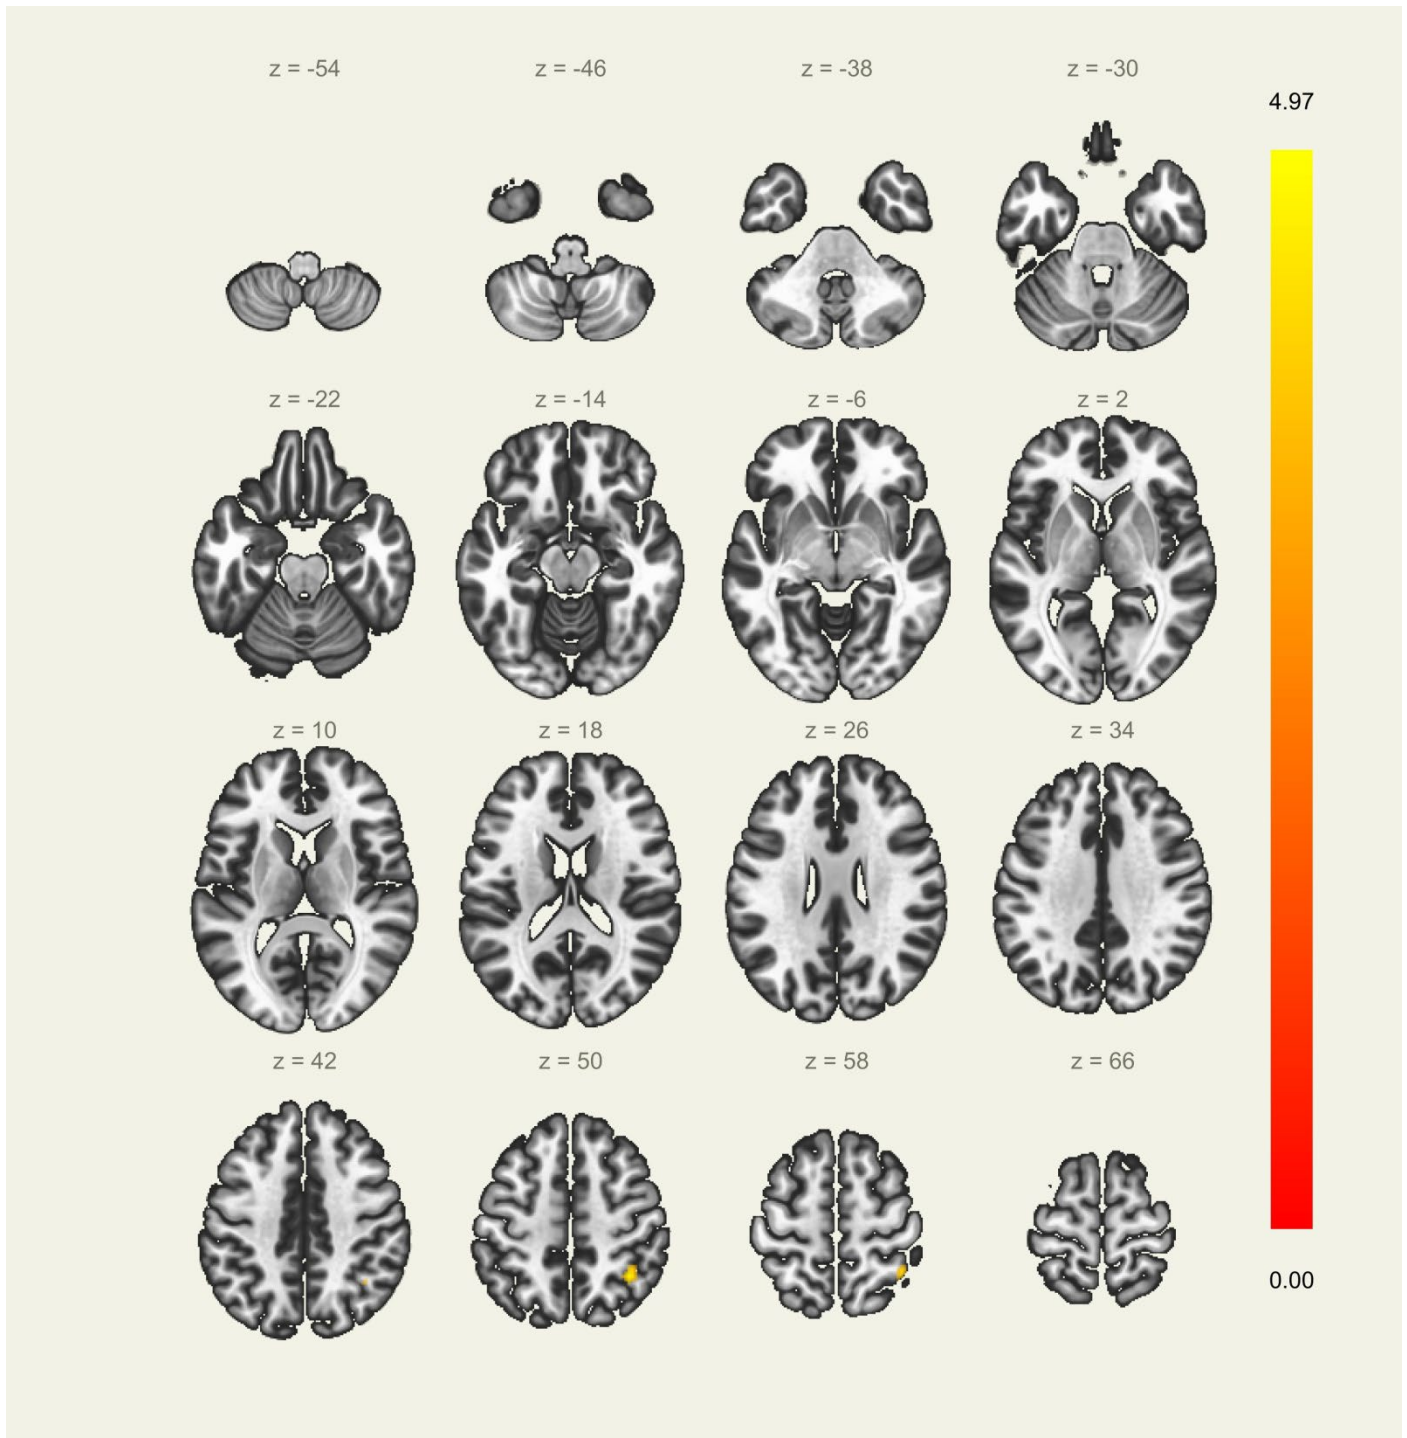

Supplemental figure 3. Seed-to-voxel analysis between low empathy vs. Healthy control. Cluster +38 -48 +54 , 119 voxels (88%) covering 8% of atlas right superior parietal lobule, and 16 voxels (12%) covering 1% of atlas right angular gyrus. What indicated that the functional connectivity between anterior division of cingulate gyrus and right superior parietal lobule was relatively increased.

**Appendix 2** to Qu J-F, Liu X-W, Wang M-Z, et al. Structural-informed functional MRI analysis of patients with empathy impairment following stroke. *J Psychiatry Neurosci* 2024. Copyright © 2024 The Author(s) or their employer(s).  
To receive this resource in an accessible format, please contact us at [cmaigroup@cmaj.ca](mailto:cmaigroup@cmaj.ca).

DOI: 10.1503/jpn240084

*Online appendices are unedited and posted as supplied by the authors.*
